# Supplementary material
Source: PubMed Central journal article supplement (PMC6201829)
Supplement: tjy117_suppl_supplementary_table_s2.pdf [file tjy117_suppl_supplementary_table_s2.pdf]

**Table S2. Larval habitat survey.** Counts of artificial and natural habitats, total volume per transect, number of sites with either *Ae. albopictus* or *Cx. quinquefasciatus* found in a habitat, and area of transect.

| Site       | Transect | No. Artificial | No. Natural | Total Volume (L) | <i>Ae. alb. Larvae</i> | <i>Cx. qui. Larvae</i> | Area (ha) |
|------------|----------|----------------|-------------|------------------|------------------------|------------------------|-----------|
| <b>AIN</b> | AIN 1    | 0              | 0           | 0                | 0                      | 0                      | 0.019     |
|            | AIN 2    | 0              | 4           | 20.39            | 0                      | 0                      | 0.075     |
|            | AIN 3    | 0              | 2           | 8.66             | 0                      | 0                      | 0.044     |
|            | AIN 4    | 0              | 1           | 7.14             | 0                      | 0                      | 0.020     |
|            | AIN 5    | 0              | 3           | 42.10            | 0                      | 0                      | 0.136     |
|            | AIN 6    | 3              | 0           | 1.93             | 0                      | 0                      | 0.195     |
| <b>BRY</b> | BRY 1    | 0              | 0           | 0                | 0                      | 0                      | 0.012     |
|            | BRY 2    | 0              | 0           | 0                | 0                      | 0                      | 0.063     |
|            | BRY 3    | 3              | 1           | 1.00             | 0                      | 0                      | 0.066     |
|            | BRY 4    | 2              | 2           | 1.39             | 0                      | 0                      | 0.190     |
|            | BRY 5    | 0              | 0           | 0                | 0                      | 0                      | 0.029     |
|            | BRY 6    | 2              | 0           | 5.15             | 0                      | 0                      | 0.094     |
|            | BRY 7    | 0              | 0           | 0                | 0                      | 0                      | 0.261     |
| <b>KEA</b> | KEA 1    | 0              | 0           | 0                | 0                      | 0                      | 0.038     |
|            | KEA 2    | 0              | 0           | 0                | 0                      | 0                      | 0.008     |
|            | KEA 3    | 0              | 0           | 0                | 0                      | 0                      | 0.074     |
|            | KEA 4    | 1              | 1           | 0.56             | 0                      | 0                      | 0.038     |
|            | KEA 5    | 1              | 0           | 0.00             | 0                      | 0                      | 0.022     |
|            | KEA 6    | 0              | 2           | 0.18             | 0                      | 0                      | 0.030     |
|            | KEA 7    | 0              | 0           | 0                | 0                      | 0                      | 0.046     |
| <b>KMR</b> | KMR 1    | 3              | 19          | 5.87             | 1 ‡                    | 0                      | 0.086     |
|            | KMR 2    | 0              | 26          | 3.07             | 0                      | 0                      | 0.119     |
|            | KMR 3    | 0              | 41          | 20.54            | 0                      | 0                      | 0.086     |
|            | KMR 4    | 0              | 3           | 0.22             | 0                      | 0                      | 0.051     |
|            | KMR 5    | 0              | 12          | 0.88             | 0                      | 0                      | 0.066     |
| <b>MAL</b> | MAL 1    | 1              | 0           | 0.35             | 0                      | 0                      | 0.032     |
|            | MAL 2    | 0              | 19          | 2.02             | 2 †                    | 0                      | 0.059     |
|            | MAL 3    | 0              | 1           | 0.01             | 0                      | 0                      | 0.181     |
|            | MAL 4    | 0              | 0           | 0                | 0                      | 0                      | 0.069     |
|            | MAL 5    | 0              | 0           | 0                | 0                      | 0                      | 0.058     |
|            | MAL 6    | 0              | 2           | 0.08             | 0                      | 0                      | 0.068     |
|            | MAL 7    | 3              | 4           | 2.47             | 0                      | 0                      | 0.184     |
| <b>NAN</b> | NAN 1    | 1              | 0           | 4.00             | 0                      | 0                      | 0.154     |
|            | NAN 2    | 1              | 0           | 7.19             | 1 ††                   | 0                      | 0.128     |
|            | NAN 3    | 0              | 7           | 0.29             | 0                      | 0                      | 0.022     |
|            | NAN 4    | 2              | 5           | 21.20            | 2 ††                   | 0                      | 0.302     |
| <b>PAN</b> | PAN 1    | 1              | 0           | 0.35             | 0                      | 0                      | 0.078     |
|            | PAN 2    | 5              | 0           | 1.93             | 0                      | 0                      | 0.079     |
|            | PAN 3    | 1              | 0           | 0.35             | 0                      | 0                      | 0.016     |
|            | PAN 4    | 0              | 1           | 2.00             | 0                      | 0                      | 0.071     |
|            | PAN 5    | 0              | 1           | 0.55             | 0                      | 0                      | 0.077     |
|            | PAN 6    | 0              | 0           | 0                | 0                      | 0                      | 0.097     |
|            | PAN 7    | 2              | 0           | 0.38             | 0                      | 0                      | 0.079     |
| <b>SHP</b> | SHP 1    | 1              | 0           | 0.15             | 0                      | 0                      | 0.060     |
|            | SHP 2    | 3              | 0           | 1.17             | 1 §                    | 0                      | 0.049     |
|            | SHP 3    | 2              | 77          | 35.20            | 1 *                    | 1 *                    | 0.019     |
|            | SHP 4    | 1              | 0           | 0.23             | 0                      | 0                      | 0.039     |
|            | SHP 5    | 3              | 0           | 2.13             | 1 **                   | 1 **                   | 0.140     |
|            | SHP 6    | 3              | 0           | 20.73            | 0                      | 0                      | 0.093     |
|            | SHP 7    | 0              | 0           | 0                | 0                      | 0                      | 0.199     |

† Larvae found along the midrib of two fallen leaves of the indigenous hala tree, *Pandanus tectorius*. ‡ Larvae found in in the depression of the fallen leaf of the invasive bingabing tree, *Macaranga grandifolia*. †† Abandoned washing machine and a discarded 18 liter (gallon) bucket. § Beer can. \* *Cx quinquefasciatus* and *Ae. albopictus* larvae found together in the wheel arch of an upturned, abandoned car. \*\* *Cx quinquefasciatus* and *Ae. albopictus* larvae found together in a discarded Spam can.
